# Supplementary material
Source: Frontiers journal article supplement (https://www.frontiersin.org/articles/190694)
Supplement: Image_3.pdf [file Image_3.pdf]

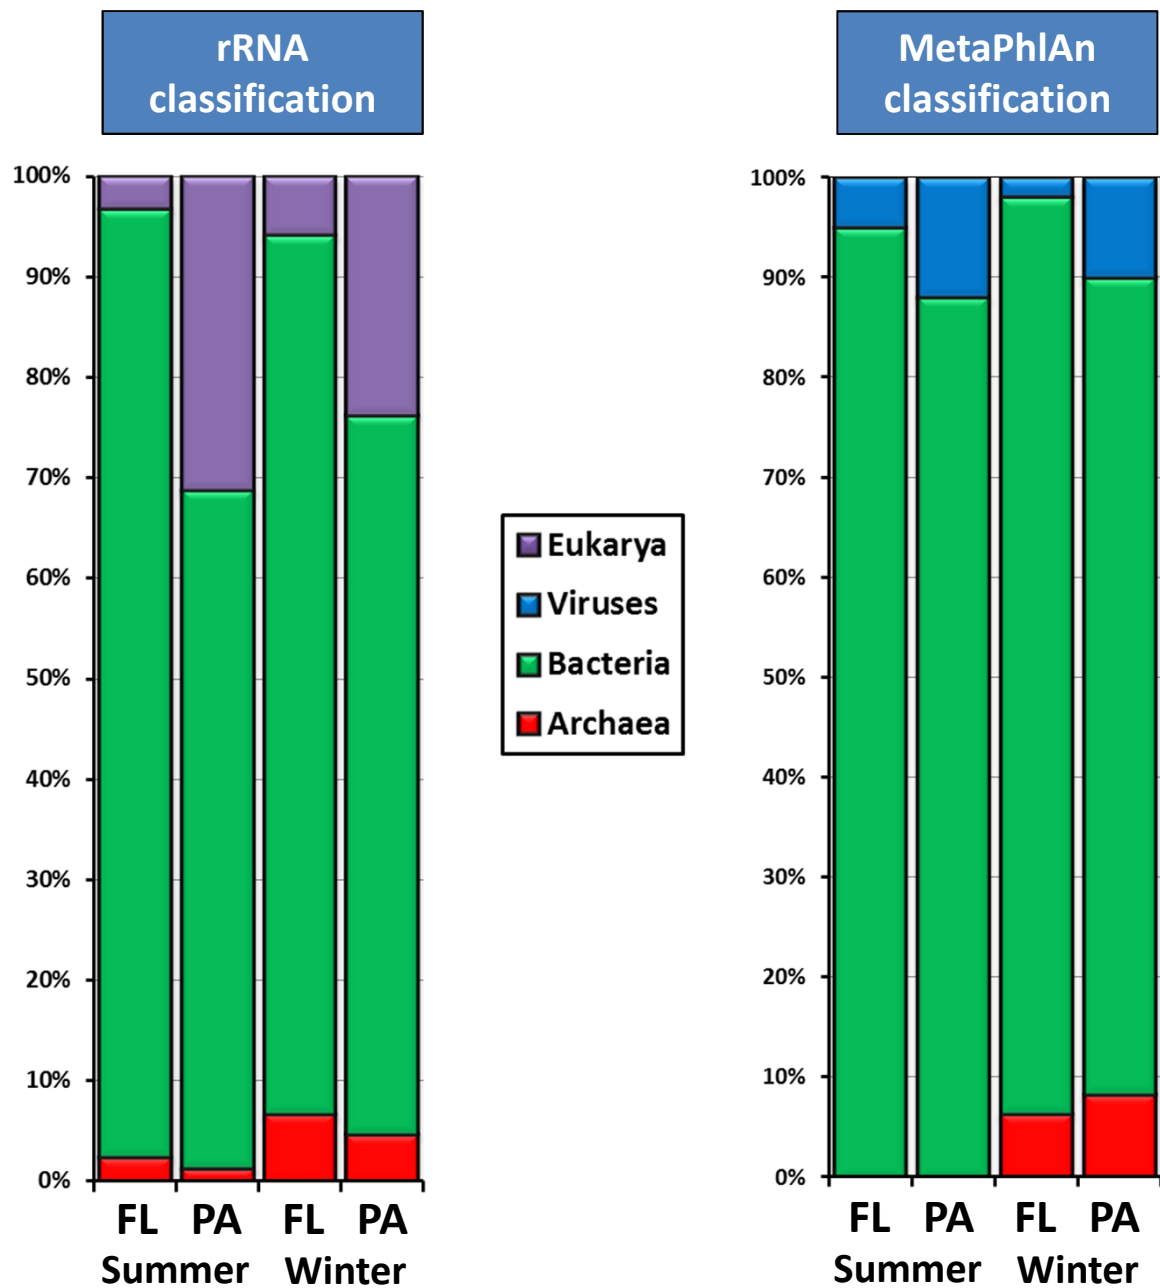

**Figure S3.-** Domain-level Phylogenetic classification of the metagenomes based on a) rRNA and b) MetaPhlAn from raw reads.
